# Supplementary material for: One-pot green synthesis of eumelanin: process optimization and its characterization
Source: Royal Society of Chemistry journal article supplement (doi:10.1039/c5ra01962a), 2015-01-01
Supplement: c5ra01962a1.pdf [file c5ra01962a1.pdf]

## One-pot green synthesis of eumelanin: Process optimization and its characterization.

Amardeep Singh Saini and Jose Savio Melo\*

Nuclear Agriculture and Biotechnology Division, Bhabha Atomic Research Centre,

Trombay, Mumbai-400 085, India

\*Corresponding author. Tel.: +91 22 25592760; fax; +91 22 25505151

E-mail: [saini\\_amardeepsingh@yahoo.co.in](mailto:saini_amardeepsingh@yahoo.co.in) (A.S.Saini), [jsmelo@barc.gov.in](mailto:jsmelo@barc.gov.in) (J.S.Melo)

### Supplementary data

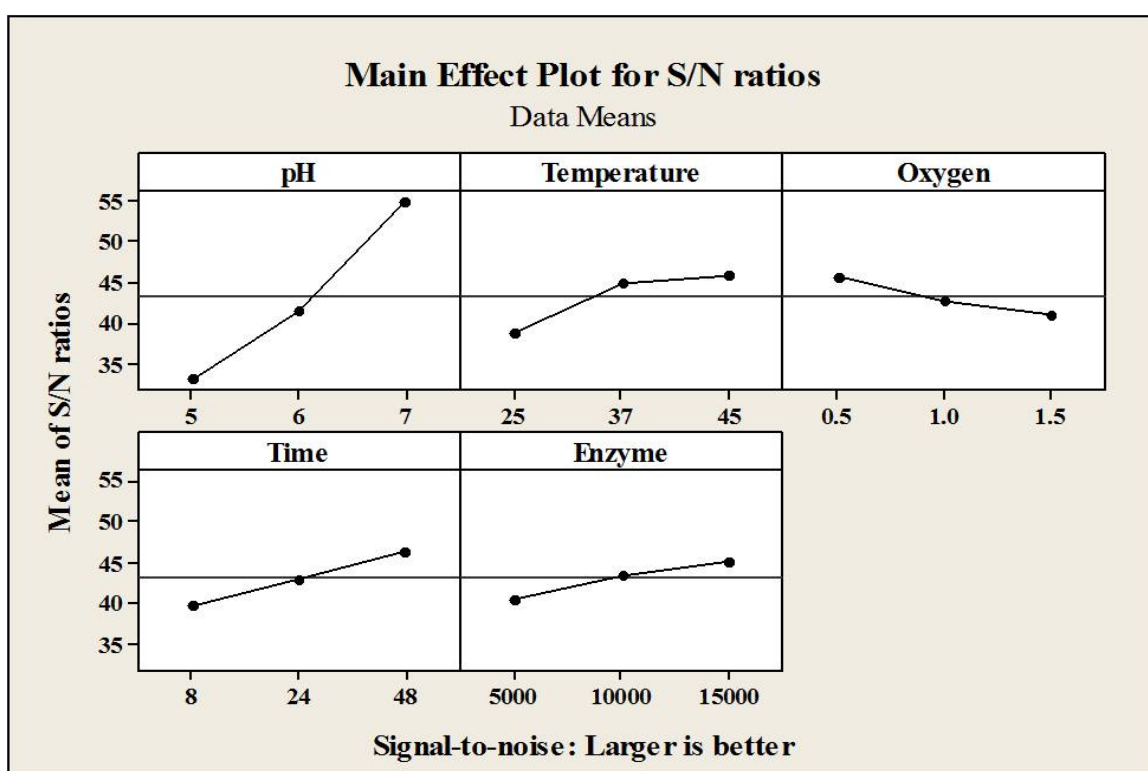

Fig. S1 The main effect of selected factors and their assigned levels on synthesis of melanin. X-axis represents the different levels of selected parameters and Y-axis represents the mean S/N ratio. Optimum conditions are indicated by the peak values of S/N ratio of each factor.

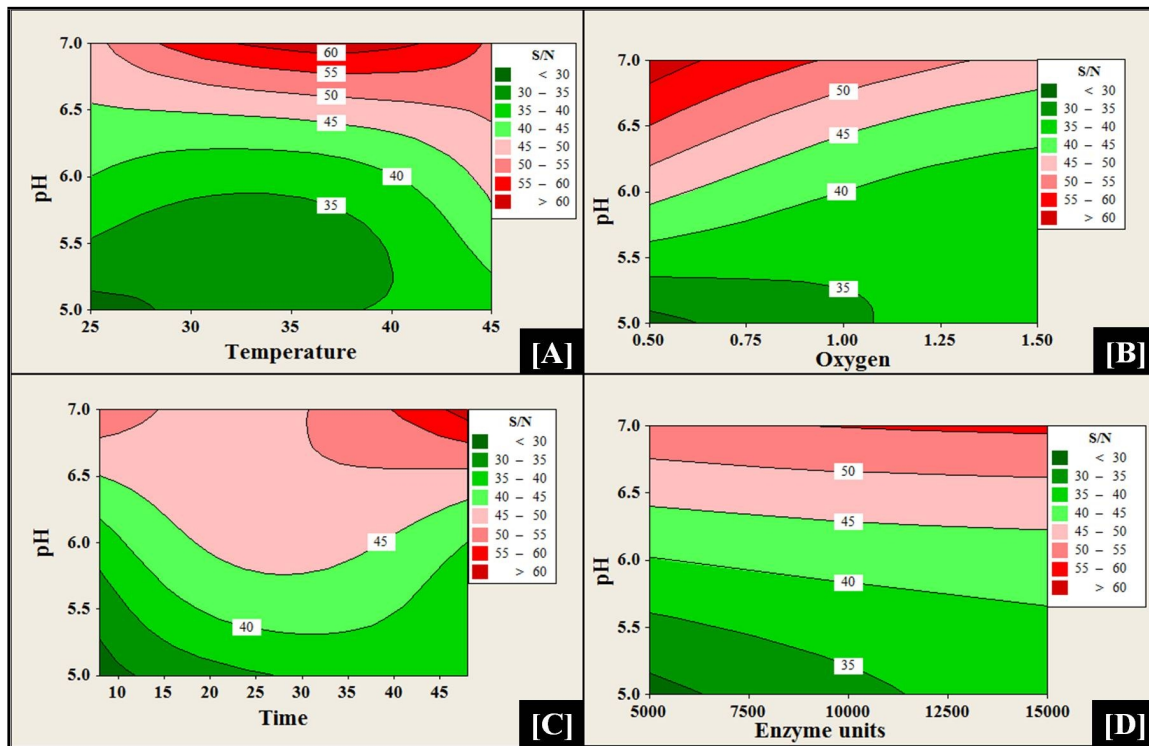

Fig. S2 Contour plot of S/N vs [A] pH, temperature [B] pH, oxygen [C] pH, time [D] pH, enzyme units.

Table S1 One way ANOVA of S/N versus each factor at 95% confidence level

One-way ANOVA: S/N versus pH

| Source | DF | SS     | MS     | F     | P     |
|--------|----|--------|--------|-------|-------|
| pH     | 2  | 2177.8 | 1088.9 | 32.73 | 0.000 |
| Error  | 24 | 798.4  | 33.3   |       |       |
| Total  | 26 | 2976.2 |        |       |       |

One-way ANOVA: S/N versus Temperature

| Source      | DF | SS   | MS  | F    | P     |
|-------------|----|------|-----|------|-------|
| Temperature | 2  | 264  | 132 | 1.17 | 0.328 |
| Error       | 24 | 2712 | 113 |      |       |
| Total       | 26 | 2976 |     |      |       |

One-way ANOVA: S/N versus Oxygen level

| Source | DF | SS   | MS  | F    | P     |
|--------|----|------|-----|------|-------|
| Oxygen | 2  | 105  | 52  | 0.44 | 0.651 |
| Error  | 24 | 2872 | 120 |      |       |
| Total  | 26 | 2976 |     |      |       |

One-way ANOVA: S/N versus Time

| Source | DF | SS   | MS  | F    | P     |
|--------|----|------|-----|------|-------|
| Time   | 2  | 195  | 98  | 0.84 | 0.443 |
| Error  | 24 | 2781 | 116 |      |       |
| Total  | 26 | 2976 |     |      |       |

One-way ANOVA: S/N versus Enzyme units

| Source | DF | SS   | MS  | F    | P     |
|--------|----|------|-----|------|-------|
| Enzyme | 2  | 106  | 53  | 0.44 | 0.648 |
| Error  | 24 | 2870 | 120 |      |       |
| Total  | 26 | 2976 |     |      |       |

Table S2 Physicochemical characterization of biosynthesized melanin

| Sr. no. | Test                                                                                                                                                                   | Result                    |
|---------|------------------------------------------------------------------------------------------------------------------------------------------------------------------------|---------------------------|
| [i]     | Color                                                                                                                                                                  | Black                     |
| [ii]    | Solubility in water                                                                                                                                                    | Insoluble                 |
| [iii]   | Solubility in organic solvents:<br><br>Acetic acid, Acetone, Benzene,<br><br>Chloroform, DMSO, Ethanol,<br><br>Ethyl acetate, Methanol,<br><br>n-hexane, PBS, Triton X | Insoluble                 |
| [iv]    | Solubility in Soluene-350:water<br>mixture (9:1) [Boiling water bath<br>for 45 min.]                                                                                   | Completely<br>solubilized |
| [v]     | Precipitation with 6 N HCl                                                                                                                                             | Precipitates readily      |
